# Supplementary material
Source: publisher figshare collection journal article supplement (https://rs.figshare.com/ndownloader/files/14605928)
Supplement: Supplementary file 1 [file 14605928]

## Sheet: flight_calendar_colour
Species	Jan	Feb	Mar	Apr	May	Jun	Jul	Aug	Sep	Oct	Nov	Dec
Andrena minutula (KIRBY, 1802)	YES	YES	YES	YES	YES	YES	YES	YES	NO	NO	NO	NO
Andrena tibialis (KIRBY, 1802)	YES	YES	YES	YES	YES	YES	YES	YES	NO	NO	NO	NO
Bombus terrestris (LINNAEUS, 1758)	NO	YES	YES	YES	YES	YES	YES	YES	YES	YES	NO	NO
Bombus lucorum (LINNAEUS, 1761)	NO	YES	YES	YES	YES	YES	YES	YES	NO	NO	NO	NO
Osmia cornuta (LATREILLE, 1805)	NO	YES	YES	YES	YES	YES	NO	NO	NO	NO	NO	NO
Andrena apicata SMITH, 1847	NO	YES	YES	YES	YES	NO	NO	NO	NO	NO	NO	NO
Bombus lapidarius (LINNAEUS, 1758)	NO	NO	YES	YES	YES	YES	YES	YES	YES	YES	NO	NO
Lasioglossum calceatum (SCOPOLI, 1763)	NO	NO	YES	YES	YES	YES	YES	YES	YES	YES	NO	NO
Lasioglossum fulvicorne (KIRBY, 1802)	NO	NO	YES	YES	YES	YES	YES	YES	YES	YES	NO	NO
Lasioglossum laevigatum (KIRBY, 1802)	NO	NO	YES	YES	YES	YES	YES	YES	YES	YES	NO	NO
Lasioglossum laticeps (SCHENCK, 1868)	NO	NO	YES	YES	YES	YES	YES	YES	YES	YES	NO	NO
Lasioglossum marginatum (BRULLÉ, 1832)	NO	NO	YES	YES	YES	YES	YES	YES	YES	YES	NO	NO
Lasioglossum morio (FABRICIUS, 1793)	NO	NO	YES	YES	YES	YES	YES	YES	YES	YES	NO	NO
Lasioglossum nitidulum (FABRICIUS, 1804)	NO	NO	YES	YES	YES	YES	YES	YES	YES	YES	NO	NO
Lasioglossum pauxillum (SCHENCK, 1853)	NO	NO	YES	YES	YES	YES	YES	YES	YES	YES	NO	NO
Lasioglossum politum (SCHENCK, 1853)	NO	NO	YES	YES	YES	YES	YES	YES	YES	YES	NO	NO
Lasioglossum subfasciatum (IMHOFF, 1832)	NO	NO	YES	YES	YES	YES	YES	YES	YES	YES	NO	NO
Lasioglossum villosulum (KIRBY, 1802)	NO	NO	YES	YES	YES	YES	YES	YES	YES	YES	NO	NO
Lasioglossum xanthopus (KIRBY, 1802)	NO	NO	YES	YES	YES	YES	YES	YES	YES	YES	NO	NO
Osmia caerulescens (LINNAEUS, 1758)	NO	NO	YES	YES	YES	YES	YES	YES	YES	YES	NO	NO
Sphecodes albilabris (FABRICIUS, 1793)	NO	NO	YES	YES	YES	YES	YES	YES	YES	YES	NO	NO
Sphecodes ephippius (LINNAEUS, 1767)	NO	NO	YES	YES	YES	YES	YES	YES	YES	YES	NO	NO
Sphecodes monilicornis (KIRBY, 1802)	NO	NO	YES	YES	YES	YES	YES	YES	YES	YES	NO	NO
Xylocopa violacea (LINNAEUS, 1758)	NO	NO	YES	YES	YES	YES	YES	YES	YES	YES	NO	NO
Andrena flavipes PANZER, 1799	NO	NO	YES	YES	YES	YES	YES	YES	YES	NO	NO	NO
Bombus jonellus (KIRBY, 1802)	NO	NO	YES	YES	YES	YES	YES	YES	YES	NO	NO	NO
Bombus monticola SMITH, 1849	NO	NO	YES	YES	YES	YES	YES	YES	YES	NO	NO	NO
Bombus semenoviellus SKORIKOV, 1910	NO	NO	YES	YES	YES	YES	YES	YES	YES	NO	NO	NO
Bombus sylvestris (LEPELETIER, 1832)	NO	NO	YES	YES	YES	YES	YES	YES	YES	NO	NO	NO
Halictus confusus SMITH, 1853	NO	NO	YES	YES	YES	YES	YES	YES	YES	NO	NO	NO
Lasioglossum lineare (SCHENCK, 1868)	NO	NO	YES	YES	YES	YES	YES	YES	YES	NO	NO	NO
Sphecodes longulus VON HAGENS, 1882	NO	NO	YES	YES	YES	YES	YES	YES	YES	NO	NO	NO
Andrena bicolor FABRICIUS, 1775	NO	NO	YES	YES	YES	YES	YES	YES	NO	NO	NO	NO
Andrena bimaculata (KIRBY, 1802)	NO	NO	YES	YES	YES	YES	YES	YES	NO	NO	NO	NO
Andrena ovatula (KIRBY, 1802)	NO	NO	YES	YES	YES	YES	YES	YES	NO	NO	NO	NO
Andrena subopaca NYLANDER, 1848	NO	NO	YES	YES	YES	YES	YES	YES	NO	NO	NO	NO
Bombus hypnorum (LINNAEUS, 1758)	NO	NO	YES	YES	YES	YES	YES	YES	NO	NO	NO	NO
Halictus subauratus (ROSSI, 1792)	NO	NO	YES	YES	YES	YES	YES	YES	NO	NO	NO	NO
Lasioglossum sexmaculatum (SCHENCK, 1853)	NO	NO	YES	YES	YES	YES	YES	YES	NO	NO	NO	NO
Megachile parietina (GEOFFROY, 1785)	NO	NO	YES	YES	YES	YES	YES	YES	NO	NO	NO	NO
Nomada fabriciana (LINNAEUS, 1767)	NO	NO	YES	YES	YES	YES	YES	YES	NO	NO	NO	NO
Nomada flavoguttata (KIRBY, 1802)	NO	NO	YES	YES	YES	YES	YES	YES	NO	NO	NO	NO
Nomada fucata PANZER, 1798	NO	NO	YES	YES	YES	YES	YES	YES	NO	NO	NO	NO
Nomada fulvicornis FABRICIUS, 1793	NO	NO	YES	YES	YES	YES	YES	YES	NO	NO	NO	NO
Nomada lathburiana (KIRBY, 1802)	NO	NO	YES	YES	YES	YES	YES	YES	NO	NO	NO	NO
Nomada panzeri LEPELETIER, 1841	NO	NO	YES	YES	YES	YES	YES	YES	NO	NO	NO	NO
Nomada sheppardana (KIRBY, 1802)	NO	NO	YES	YES	YES	YES	YES	YES	NO	NO	NO	NO
Osmia bicolor (SCHRANK, 1781)	NO	NO	YES	YES	YES	YES	YES	YES	NO	NO	NO	NO
Osmia bicornis (LINNAEUS, 1758)	NO	NO	YES	YES	YES	YES	YES	YES	NO	NO	NO	NO
Osmia mustelina GERSTAECKER, 1869	NO	NO	YES	YES	YES	YES	YES	YES	NO	NO	NO	NO
Osmia uncinata GERSTAECKER, 1869	NO	NO	YES	YES	YES	YES	YES	YES	NO	NO	NO	NO
Andrena barbilabris (KIRBY, 1802)	NO	NO	YES	YES	YES	YES	YES	NO	NO	NO	NO	NO
Andrena nigroaenea (KIRBY, 1802)	NO	NO	YES	YES	YES	YES	YES	NO	NO	NO	NO	NO
Andrena similis SMITH, 1849	NO	NO	YES	YES	YES	YES	YES	NO	NO	NO	NO	NO
Andrena wilkella (KIRBY, 1802)	NO	NO	YES	YES	YES	YES	YES	NO	NO	NO	NO	NO
Bombus pratorum (LINNAEUS, 1761)	NO	NO	YES	YES	YES	YES	YES	NO	NO	NO	NO	NO
Melecta albifrons (FORSTER, 1771)	NO	NO	YES	YES	YES	YES	YES	NO	NO	NO	NO	NO
Andrena gravida IMHOFF, 1832	NO	NO	YES	YES	YES	YES	NO	NO	NO	NO	NO	NO
Andrena haemorrhoa (FABRICIUS, 1781)	NO	NO	YES	YES	YES	YES	NO	NO	NO	NO	NO	NO
Andrena mitis SCHMIEDEKNECHT, 1883	NO	NO	YES	YES	YES	YES	NO	NO	NO	NO	NO	NO
Andrena nitida (MUELLER, 1776)	NO	NO	YES	YES	YES	YES	NO	NO	NO	NO	NO	NO
Andrena nycthemera IMHOFF, 1868	NO	NO	YES	YES	YES	YES	NO	NO	NO	NO	NO	NO
Andrena taraxaci GIRAUD, 1861	NO	NO	YES	YES	YES	YES	NO	NO	NO	NO	NO	NO
Andrena vaga PANZER, 1799	NO	NO	YES	YES	YES	YES	NO	NO	NO	NO	NO	NO
Anthophora plumipes (PALLAS, 1772)	NO	NO	YES	YES	YES	YES	NO	NO	NO	NO	NO	NO
Nomada bifasciata OLIVIER, 1811	NO	NO	YES	YES	YES	YES	NO	NO	NO	NO	NO	NO
Nomada flava PANZER, 1798	NO	NO	YES	YES	YES	YES	NO	NO	NO	NO	NO	NO
Nomada leucophthalma (KIRBY, 1802)	NO	NO	YES	YES	YES	YES	NO	NO	NO	NO	NO	NO
Nomada obscura ZETTERSTEDT, 1838	NO	NO	YES	YES	YES	YES	NO	NO	NO	NO	NO	NO
Nomada ruficornis (LINNAEUS, 1758)	NO	NO	YES	YES	YES	YES	NO	NO	NO	NO	NO	NO
Nomada signata JURINE, 1807	NO	NO	YES	YES	YES	YES	NO	NO	NO	NO	NO	NO
Nomada succincta PANZER, 1798	NO	NO	YES	YES	YES	YES	NO	NO	NO	NO	NO	NO
Osmia aurulenta (PANZER, 1799)	NO	NO	YES	YES	YES	YES	NO	NO	NO	NO	NO	NO
Osmia pilicornis SMITH, 1846	NO	NO	YES	YES	YES	YES	NO	NO	NO	NO	NO	NO
Andrena rosae PANZER, 1801	NO	NO	YES	YES	YES	NO	YES	YES	NO	NO	NO	NO
Andrena cineraria (LINNAEUS, 1758)	NO	NO	YES	YES	YES	NO	NO	NO	NO	NO	NO	NO
Andrena clarkella (KIRBY, 1802)	NO	NO	YES	YES	YES	NO	NO	NO	NO	NO	NO	NO
Andrena falsifica PERKINS, 1915	NO	NO	YES	YES	YES	NO	NO	NO	NO	NO	NO	NO
Andrena fulva (MUELLER, 1766)	NO	NO	YES	YES	YES	NO	NO	NO	NO	NO	NO	NO
Andrena potentillae PANZER, 1809	NO	NO	YES	YES	YES	NO	NO	NO	NO	NO	NO	NO
Andrena praecox (SCOPOLI, 1763)	NO	NO	YES	YES	YES	NO	NO	NO	NO	NO	NO	NO
Andrena ruficrus NYLANDER, 1848	NO	NO	YES	YES	YES	NO	NO	NO	NO	NO	NO	NO
Andrena sericata IMHOFF, 1868	NO	NO	YES	YES	YES	NO	NO	NO	NO	NO	NO	NO
Andrena tscheki MORAWITZ, 1872	NO	NO	YES	YES	YES	NO	NO	NO	NO	NO	NO	NO
Andrena varians (KIRBY, 1802)	NO	NO	YES	YES	YES	NO	NO	NO	NO	NO	NO	NO
Andrena ventralis IMHOFF, 1832	NO	NO	YES	YES	YES	NO	NO	NO	NO	NO	NO	NO
Nomada ferruginata (LINNAEUS, 1767)	NO	NO	YES	YES	YES	NO	NO	NO	NO	NO	NO	NO
Colletes cunicularius (LINNAEUS, 1761)	NO	NO	YES	YES	NO	NO	NO	NO	NO	NO	NO	NO
Bombus humilis ILLIGER, 1806	NO	NO	NO	YES	YES	YES	YES	YES	YES	YES	NO	NO
Bombus mendax GERSTAECKER, 1869	NO	NO	NO	YES	YES	YES	YES	YES	YES	YES	NO	NO
Bombus pascuorum (SCOPOLI, 1763)	NO	NO	NO	YES	YES	YES	YES	YES	YES	YES	NO	NO
Bombus sylvarum (LINNAEUS, 1761)	NO	NO	NO	YES	YES	YES	YES	YES	YES	YES	NO	NO
Bombus wurflenii RADOSZKOWSKI, 1859	NO	NO	NO	YES	YES	YES	YES	YES	YES	YES	NO	NO
Ceratina cyanea (KIRBY, 1802)	NO	NO	NO	YES	YES	YES	YES	YES	YES	YES	NO	NO
Lasioglossum albipes (FABRICIUS, 1781)	NO	NO	NO	YES	YES	YES	YES	YES	YES	YES	NO	NO
Lasioglossum brevicorne (SCHENCK, 1868)	NO	NO	NO	YES	YES	YES	YES	YES	YES	YES	NO	NO
Lasioglossum euboeense (STRAND, 1909)	NO	NO	NO	YES	YES	YES	YES	YES	YES	YES	NO	NO
Lasioglossum fratellum (PÉREZ, 1903)	NO	NO	NO	YES	YES	YES	YES	YES	YES	YES	NO	NO
Lasioglossum glabriusculum (MORAWITZ, 1872)	NO	NO	NO	YES	YES	YES	YES	YES	YES	YES	NO	NO
Lasioglossum interruptum (PANZER, 1798)	NO	NO	NO	YES	YES	YES	YES	YES	YES	YES	NO	NO
Lasioglossum lativentre (SCHENCK, 1853)	NO	NO	NO	YES	YES	YES	YES	YES	YES	YES	NO	NO
Lasioglossum leucozonium (SCHRANK, 1781)	NO	NO	NO	YES	YES	YES	YES	YES	YES	YES	NO	NO
Lasioglossum lucidulum (SCHENCK, 1861)	NO	NO	NO	YES	YES	YES	YES	YES	YES	YES	NO	NO
Lasioglossum malachurum (KIRBY, 1802)	NO	NO	NO	YES	YES	YES	YES	YES	YES	YES	NO	NO
Lasioglossum nigripes (LEPELETIER, 1841)	NO	NO	NO	YES	YES	YES	YES	YES	YES	YES	NO	NO
Lasioglossum parvulum (SCHENCK, 1853)	NO	NO	NO	YES	YES	YES	YES	YES	YES	YES	NO	NO
Lasioglossum prasinum (SMITH, 1848)	NO	NO	NO	YES	YES	YES	YES	YES	YES	YES	NO	NO
Lasioglossum punctatissimum (SCHENCK, 1853)	NO	NO	NO	YES	YES	YES	YES	YES	YES	YES	NO	NO
Lasioglossum puncticolle (MORAWITZ, 1872)	NO	NO	NO	YES	YES	YES	YES	YES	YES	YES	NO	NO
Lasioglossum quadrinotatulum (SCHENCK, 1861)	NO	NO	NO	YES	YES	YES	YES	YES	YES	YES	NO	NO
Lasioglossum quadrinotatum (KIRBY, 1802)	NO	NO	NO	YES	YES	YES	YES	YES	YES	YES	NO	NO
Lasioglossum rufitarse (ZETTERSTEDT, 1838)	NO	NO	NO	YES	YES	YES	YES	YES	YES	YES	NO	NO
Lasioglossum sexnotatum (KIRBY, 1802)	NO	NO	NO	YES	YES	YES	YES	YES	YES	YES	NO	NO
Lasioglossum sexstrigatum (SCHENCK, 1868)	NO	NO	NO	YES	YES	YES	YES	YES	YES	YES	NO	NO
Lasioglossum zonulum (SMITH, 1848)	NO	NO	NO	YES	YES	YES	YES	YES	YES	YES	NO	NO
Nomada distinguenda MORAWITZ, 1874	NO	NO	NO	YES	YES	YES	YES	YES	YES	YES	NO	NO
Sphecodes crassus THOMSON, 1870	NO	NO	NO	YES	YES	YES	YES	YES	YES	YES	NO	NO
Sphecodes ferruginatus VON HAGENS, 1882	NO	NO	NO	YES	YES	YES	YES	YES	YES	YES	NO	NO
Sphecodes geoffrellus (KIRBY, 1802)	NO	NO	NO	YES	YES	YES	YES	YES	YES	YES	NO	NO
Sphecodes gibbus (LINNAEUS, 1758)	NO	NO	NO	YES	YES	YES	YES	YES	YES	YES	NO	NO
Sphecodes hyalinatus VON HAGENS, 1882	NO	NO	NO	YES	YES	YES	YES	YES	YES	YES	NO	NO
Sphecodes reticulatus THOMSON, 1870	NO	NO	NO	YES	YES	YES	YES	YES	YES	YES	NO	NO
Xylocopa iris (CHRIST, 1791)	NO	NO	NO	YES	YES	YES	YES	YES	YES	YES	NO	NO
Andrena minutuloides PERKINS, 1914	NO	NO	NO	YES	YES	YES	YES	YES	YES	NO	NO	NO
Andrena thoracica (FABRICIUS, 1775)	NO	NO	NO	YES	YES	YES	YES	YES	YES	NO	NO	NO
Bombus alpinus (LINNAEUS, 1758)	NO	NO	NO	YES	YES	YES	YES	YES	YES	NO	NO	NO
Bombus quadricolor (LEPELETIER, 1832)	NO	NO	NO	YES	YES	YES	YES	YES	YES	NO	NO	NO
Bombus ruderarius (MUELLER, 1776)	NO	NO	NO	YES	YES	YES	YES	YES	YES	NO	NO	NO
Bombus sichelii RADOSZKOWSKI, 1859	NO	NO	NO	YES	YES	YES	YES	YES	YES	NO	NO	NO
Bombus soroeensis (FABRICIUS, 1776)	NO	NO	NO	YES	YES	YES	YES	YES	YES	NO	NO	NO
Bombus veteranus (FABRICIUS, 1793)	NO	NO	NO	YES	YES	YES	YES	YES	YES	NO	NO	NO
Ceratina chalybea CHEVRIER, 1872	NO	NO	NO	YES	YES	YES	YES	YES	YES	NO	NO	NO
Halictus eurygnathus BLÜTHGEN, 1931	NO	NO	NO	YES	YES	YES	YES	YES	YES	NO	NO	NO
Halictus leucaheneus EBMER, 1972	NO	NO	NO	YES	YES	YES	YES	YES	YES	NO	NO	NO
Halictus maculatus SMITH, 1848	NO	NO	NO	YES	YES	YES	YES	YES	YES	NO	NO	NO
Halictus quadricinctus (FABRICIUS, 1776)	NO	NO	NO	YES	YES	YES	YES	YES	YES	NO	NO	NO
Halictus rubicundus (CHRIST, 1791)	NO	NO	NO	YES	YES	YES	YES	YES	YES	NO	NO	NO
Halictus scabiosae (ROSSI, 1790)	NO	NO	NO	YES	YES	YES	YES	YES	YES	NO	NO	NO
Halictus tumulorum (LINNAEUS, 1758)	NO	NO	NO	YES	YES	YES	YES	YES	YES	NO	NO	NO
Hylaeus confusus NYLANDER, 1852	NO	NO	NO	YES	YES	YES	YES	YES	YES	NO	NO	NO
Hylaeus signatus (PANZER, 1798)	NO	NO	NO	YES	YES	YES	YES	YES	YES	NO	NO	NO
Lasioglossum aeratum (KIRBY, 1802)	NO	NO	NO	YES	YES	YES	YES	YES	YES	NO	NO	NO
Lasioglossum costulatum (KRIECHBAUMER, 1873)	NO	NO	NO	YES	YES	YES	YES	YES	YES	NO	NO	NO
Lasioglossum cupromicans (PÉREZ, 1903)	NO	NO	NO	YES	YES	YES	YES	YES	YES	NO	NO	NO
Lasioglossum laeve (KIRBY, 1802)	NO	NO	NO	YES	YES	YES	YES	YES	YES	NO	NO	NO
Lasioglossum majus (NYLANDER, 1852)	NO	NO	NO	YES	YES	YES	YES	YES	YES	NO	NO	NO
Lasioglossum minutissimum (KIRBY, 1802)	NO	NO	NO	YES	YES	YES	YES	YES	YES	NO	NO	NO
Lasioglossum minutulum (SCHENCK, 1853)	NO	NO	NO	YES	YES	YES	YES	YES	YES	NO	NO	NO
Lasioglossum nitidiusculum (KIRBY, 1802)	NO	NO	NO	YES	YES	YES	YES	YES	YES	NO	NO	NO
Lasioglossum pygmaeum (SCHENCK, 1853)	NO	NO	NO	YES	YES	YES	YES	YES	YES	NO	NO	NO
Lasioglossum quadrisignatum (SCHENCK, 1853)	NO	NO	NO	YES	YES	YES	YES	YES	YES	NO	NO	NO
Lasioglossum tricinctum (SCHENCK, 1874)	NO	NO	NO	YES	YES	YES	YES	YES	YES	NO	NO	NO
Osmia leaiana (KIRBY, 1802)	NO	NO	NO	YES	YES	YES	YES	YES	YES	NO	NO	NO
Sphecodes miniatus VON HAGENS, 1882	NO	NO	NO	YES	YES	YES	YES	YES	YES	NO	NO	NO
Sphecodes niger VON HAGENS, 1874	NO	NO	NO	YES	YES	YES	YES	YES	YES	NO	NO	NO
Sphecodes pellucidus SMITH, 1845	NO	NO	NO	YES	YES	YES	YES	YES	YES	NO	NO	NO
Sphecodes puncticeps THOMSON, 1870	NO	NO	NO	YES	YES	YES	YES	YES	YES	NO	NO	NO
Sphecodes rufiventris (PANZER, 1798)	NO	NO	NO	YES	YES	YES	YES	YES	YES	NO	NO	NO
Sphecodes schenckii VON HAGENS, 1882	NO	NO	NO	YES	YES	YES	YES	YES	YES	NO	NO	NO
Stelis phaeoptera (KIRBY, 1802)	NO	NO	NO	YES	YES	YES	YES	YES	YES	NO	NO	NO
Andrena dorsata (KIRBY, 1802)	NO	NO	NO	YES	YES	YES	YES	YES	NO	NO	NO	NO
Anthidium strigatum (PANZER, 1805)	NO	NO	NO	YES	YES	YES	YES	YES	NO	NO	NO	NO
Bombus bohemicus SEIDL, 1838	NO	NO	NO	YES	YES	YES	YES	YES	NO	NO	NO	NO
Bombus hortorum (LINNAEUS, 1761)	NO	NO	NO	YES	YES	YES	YES	YES	NO	NO	NO	NO
Bombus norvegicus (SPARRE-SCHNEIDER, 1918)	NO	NO	NO	YES	YES	YES	YES	YES	NO	NO	NO	NO
Bombus pomorum (PANZER, 1805)	NO	NO	NO	YES	YES	YES	YES	YES	NO	NO	NO	NO
Bombus rupestris (FABRICIUS, 1793)	NO	NO	NO	YES	YES	YES	YES	YES	NO	NO	NO	NO
Bombus vestalis (GEOFFROY, 1785)	NO	NO	NO	YES	YES	YES	YES	YES	NO	NO	NO	NO
Halictus smaragdulus VACHAL, 1895	NO	NO	NO	YES	YES	YES	YES	YES	NO	NO	NO	NO
Lasioglossum intermedium (SCHENCK, 1868)	NO	NO	NO	YES	YES	YES	YES	YES	NO	NO	NO	NO
Lasioglossum lissonotum (NOSKIEWICZ, 1926)	NO	NO	NO	YES	YES	YES	YES	YES	NO	NO	NO	NO
Lasioglossum semilucens (ALFKEN, 1914)	NO	NO	NO	YES	YES	YES	YES	YES	NO	NO	NO	NO
Lasioglossum tarsatum (SCHENCK, 1868)	NO	NO	NO	YES	YES	YES	YES	YES	NO	NO	NO	NO
Lithurgus chrysurus FONSCOLOMBE, 1834	NO	NO	NO	YES	YES	YES	YES	YES	NO	NO	NO	NO
Nomada bluethgeni STÖCKHERT, 1943	NO	NO	NO	YES	YES	YES	YES	YES	NO	NO	NO	NO
Nomada integra BRULLÉ, 1832	NO	NO	NO	YES	YES	YES	YES	YES	NO	NO	NO	NO
Nomada rhenana MORAWITZ, 1872	NO	NO	NO	YES	YES	YES	YES	YES	NO	NO	NO	NO
Nomada stigma FABRICIUS, 1804	NO	NO	NO	YES	YES	YES	YES	YES	NO	NO	NO	NO
Nomada striata FABRICIUS, 1793	NO	NO	NO	YES	YES	YES	YES	YES	NO	NO	NO	NO
Nomada zonata PANZER, 1798	NO	NO	NO	YES	YES	YES	YES	YES	NO	NO	NO	NO
Osmia gallarum SPINOLA, 1808	NO	NO	NO	YES	YES	YES	YES	YES	NO	NO	NO	NO
Osmia parietina CURTIS, 1828	NO	NO	NO	YES	YES	YES	YES	YES	NO	NO	NO	NO
Osmia ravouxi PÉREZ, 1902	NO	NO	NO	YES	YES	YES	YES	YES	NO	NO	NO	NO
Osmia rufohirta LATREILLE, 1811	NO	NO	NO	YES	YES	YES	YES	YES	NO	NO	NO	NO
Stelis ornatula (KLUG, 1807)	NO	NO	NO	YES	YES	YES	YES	YES	NO	NO	NO	NO
Andrena labiata FABRICIUS, 1781	NO	NO	NO	YES	YES	YES	YES	NO	NO	NO	NO	NO
Andrena lathyri ALFKEN, 1899	NO	NO	NO	YES	YES	YES	YES	NO	NO	NO	NO	NO
Andrena nanaeformis NOSKIEWICZ, 1925	NO	NO	NO	YES	YES	YES	YES	NO	NO	NO	NO	NO
Anthophora aestivalis (PANZER, 1801)	NO	NO	NO	YES	YES	YES	YES	NO	NO	NO	NO	NO
Anthophora plagiata (ILLIGER, 1806)	NO	NO	NO	YES	YES	YES	YES	NO	NO	NO	NO	NO
Anthophora retusa (LINNAEUS, 1758)	NO	NO	NO	YES	YES	YES	YES	NO	NO	NO	NO	NO
Melecta luctuosa (SCOPOLI, 1770)	NO	NO	NO	YES	YES	YES	YES	NO	NO	NO	NO	NO
Melitta dimidiata MORAWITZ, 1876	NO	NO	NO	YES	YES	YES	YES	NO	NO	NO	NO	NO
Nomada femoralis MORAWITZ, 1869	NO	NO	NO	YES	YES	YES	YES	NO	NO	NO	NO	NO
Nomada guttulata SCHENCK, 1861	NO	NO	NO	YES	YES	YES	YES	NO	NO	NO	NO	NO
Nomada marshamella (KIRBY, 1802)	NO	NO	NO	YES	YES	YES	YES	NO	NO	NO	NO	NO
Nomada melathoracica IMHOFF, 1834	NO	NO	NO	YES	YES	YES	YES	NO	NO	NO	NO	NO
Nomada mutica MORAWITZ, 1872	NO	NO	NO	YES	YES	YES	YES	NO	NO	NO	NO	NO
Nomada villosa THOMSON, 1870	NO	NO	NO	YES	YES	YES	YES	NO	NO	NO	NO	NO
Osmia nigriventris (ZETTERSTEDT, 1838)	NO	NO	NO	YES	YES	YES	YES	NO	NO	NO	NO	NO
Osmia niveata (FABRICIUS, 1804)	NO	NO	NO	YES	YES	YES	YES	NO	NO	NO	NO	NO
Osmia versicolor LATREILLE, 1811	NO	NO	NO	YES	YES	YES	YES	NO	NO	NO	NO	NO
Osmia viridana MORAWITZ, 1874	NO	NO	NO	YES	YES	YES	YES	NO	NO	NO	NO	NO
Andrena aberrans EVERSMANN, 1852	NO	NO	NO	YES	YES	YES	NO	NO	NO	NO	NO	NO
Andrena chrysopyga SCHENCK, 1853	NO	NO	NO	YES	YES	YES	NO	NO	NO	NO	NO	NO
Andrena chrysosceles (KIRBY, 1802)	NO	NO	NO	YES	YES	YES	NO	NO	NO	NO	NO	NO
Andrena lagopus (LATREILLE, 1809)	NO	NO	NO	YES	YES	YES	NO	NO	NO	NO	NO	NO
Andrena proxima (KIRBY, 1802)	NO	NO	NO	YES	YES	YES	NO	NO	NO	NO	NO	NO
Andrena scotica PERKINS, 1916	NO	NO	NO	YES	YES	YES	NO	NO	NO	NO	NO	NO
Andrena symphyti SCHMIEDEKNECHT, 1883	NO	NO	NO	YES	YES	YES	NO	NO	NO	NO	NO	NO
Andrena viridescens VIERECK, 1916	NO	NO	NO	YES	YES	YES	NO	NO	NO	NO	NO	NO
Eucera nigrescens PÉREZ, 1879	NO	NO	NO	YES	YES	YES	NO	NO	NO	NO	NO	NO
Nomada atroscutellaris STRAND, 1921	NO	NO	NO	YES	YES	YES	NO	NO	NO	NO	NO	NO
Nomada goodeniana (KIRBY, 1802)	NO	NO	NO	YES	YES	YES	NO	NO	NO	NO	NO	NO
Nomada hirtipes PÉREZ, 1884	NO	NO	NO	YES	YES	YES	NO	NO	NO	NO	NO	NO
Nomada sexfasciata PANZER, 1799	NO	NO	NO	YES	YES	YES	NO	NO	NO	NO	NO	NO
Sphecodes ruficrus (ERICHSON, 1835)	NO	NO	NO	YES	YES	YES	NO	NO	NO	NO	NO	NO
Andrena argentata SMITH, 1844	NO	NO	NO	YES	YES	NO	YES	YES	YES	NO	NO	NO
Andrena pilipes FABRICIUS, 1781	NO	NO	NO	YES	YES	NO	YES	YES	YES	NO	NO	NO
Andrena nuptialis PÉREZ, 1902	NO	NO	NO	YES	YES	NO	YES	YES	NO	NO	NO	NO
Andrena bucephala STEPHENS, 1846	NO	NO	NO	YES	YES	NO	NO	NO	NO	NO	NO	NO
Nomada alboguttata HERRICH-SCHÄFFER, 1839	NO	NO	NO	YES	YES	NO	NO	NO	NO	NO	NO	NO
Sphecodes majalis PÉREZ, 1903	NO	NO	NO	YES	YES	NO	NO	NO	NO	NO	NO	NO
Bombus mesomelas GERSTAECKER, 1869	NO	NO	NO	NO	YES	YES	YES	YES	YES	YES	NO	NO
Bombus mucidus GERSTAECKER, 1869	NO	NO	NO	NO	YES	YES	YES	YES	YES	YES	NO	NO
Coelioxys inermis (KIRBY, 1802)	NO	NO	NO	NO	YES	YES	YES	YES	YES	YES	NO	NO
Hylaeus communis NYLANDER, 1852	NO	NO	NO	NO	YES	YES	YES	YES	YES	YES	NO	NO
Megachile melanopyga COSTA, 1863	NO	NO	NO	NO	YES	YES	YES	YES	YES	YES	NO	NO
Nomada flavopicta (KIRBY, 1802)	NO	NO	NO	NO	YES	YES	YES	YES	YES	YES	NO	NO
Sphecodes croaticus MEYER, 1922	NO	NO	NO	NO	YES	YES	YES	YES	YES	YES	NO	NO
Andrena polita SMITH, 1847	NO	NO	NO	NO	YES	YES	YES	YES	YES	NO	NO	NO
Anthidium punctatum LATREILLE, 1809	NO	NO	NO	NO	YES	YES	YES	YES	YES	NO	NO	NO
Anthophora bimaculata (PANZER, 1798)	NO	NO	NO	NO	YES	YES	YES	YES	YES	NO	NO	NO
Bombus muscorum (LINNAEUS, 1758)	NO	NO	NO	NO	YES	YES	YES	YES	YES	NO	NO	NO
Bombus pyrenaeus PÉREZ, 1879	NO	NO	NO	NO	YES	YES	YES	YES	YES	NO	NO	NO
Ceratina cucurbitina (ROSSI, 1792)	NO	NO	NO	NO	YES	YES	YES	YES	YES	NO	NO	NO
Coelioxys elongata LEPELETIER, 1841	NO	NO	NO	NO	YES	YES	YES	YES	YES	NO	NO	NO
Halictus sexcinctus (FABRICIUS, 1775)	NO	NO	NO	NO	YES	YES	YES	YES	YES	NO	NO	NO
Hylaeus gibbus SAUNDERS, 1850	NO	NO	NO	NO	YES	YES	YES	YES	YES	NO	NO	NO
Hylaeus hyalinatus SMITH, 1842	NO	NO	NO	NO	YES	YES	YES	YES	YES	NO	NO	NO
Hylaeus leptocephalus (MORAWITZ, 1870)	NO	NO	NO	NO	YES	YES	YES	YES	YES	NO	NO	NO
Hylaeus nigritus (FABRICIUS, 1798)	NO	NO	NO	NO	YES	YES	YES	YES	YES	NO	NO	NO
Hylaeus pectoralis FÖRSTER, 1871	NO	NO	NO	NO	YES	YES	YES	YES	YES	NO	NO	NO
Megachile analis NYLANDER, 1852	NO	NO	NO	NO	YES	YES	YES	YES	YES	NO	NO	NO
Megachile leachella CURTIS, 1828	NO	NO	NO	NO	YES	YES	YES	YES	YES	NO	NO	NO
Megachile pilidens ALFKEN, 1924	NO	NO	NO	NO	YES	YES	YES	YES	YES	NO	NO	NO
Megachile versicolor SMITH, 1844	NO	NO	NO	NO	YES	YES	YES	YES	YES	NO	NO	NO
Megachile willughbiella (KIRBY, 1802)	NO	NO	NO	NO	YES	YES	YES	YES	YES	NO	NO	NO
Nomada emarginata MORAWITZ, 1877	NO	NO	NO	NO	YES	YES	YES	YES	YES	NO	NO	NO
Osmia spinulosa (KIRBY, 1802)	NO	NO	NO	NO	YES	YES	YES	YES	YES	NO	NO	NO
Sphecodes scabricollis WESMAEL, 1835	NO	NO	NO	NO	YES	YES	YES	YES	YES	NO	NO	NO
Stelis breviuscula (NYLANDER, 1848)	NO	NO	NO	NO	YES	YES	YES	YES	YES	NO	NO	NO
Stelis punctulatissima (KIRBY, 1802)	NO	NO	NO	NO	YES	YES	YES	YES	YES	NO	NO	NO
Thyreus orbatus (LEPELETIER, 1841)	NO	NO	NO	NO	YES	YES	YES	YES	YES	NO	NO	NO
Andrena alfkenella PERKINS, 1914	NO	NO	NO	NO	YES	YES	YES	YES	NO	NO	NO	NO
Andrena florea FABRICIUS, 1793	NO	NO	NO	NO	YES	YES	YES	YES	NO	NO	NO	NO
Andrena hattorfiana (FABRICIUS, 1775)	NO	NO	NO	NO	YES	YES	YES	YES	NO	NO	NO	NO
Andrena hypopolia SCHMIEDEKNECHT, 1883	NO	NO	NO	NO	YES	YES	YES	YES	NO	NO	NO	NO
Andrena rogenhoferi MORAWITZ, 1872	NO	NO	NO	NO	YES	YES	YES	YES	NO	NO	NO	NO
Anthophora quadrimaculata (PANZER, 1798)	NO	NO	NO	NO	YES	YES	YES	YES	NO	NO	NO	NO
Osmia rapunculi (LEPELETIER, 1841)	NO	NO	NO	NO	YES	YES	YES	YES	NO	NO	NO	NO
Coelioxys conica (LINNAEUS, 1758)	NO	NO	NO	NO	YES	YES	YES	YES	NO	NO	NO	NO
Colletes floralis EVERSMANN, 1852	NO	NO	NO	NO	YES	YES	YES	YES	NO	NO	NO	NO
Hylaeus duckei (ALFKEN, 1904)	NO	NO	NO	NO	YES	YES	YES	YES	NO	NO	NO	NO
Hylaeus punctatus (BRULLÉ, 1832)	NO	NO	NO	NO	YES	YES	YES	YES	NO	NO	NO	NO
Hylaeus punctulatissimus SMITH, 1842	NO	NO	NO	NO	YES	YES	YES	YES	NO	NO	NO	NO
Lasioglossum convexiusculum (SCHENCK, 1853)	NO	NO	NO	NO	YES	YES	YES	YES	NO	NO	NO	NO
Lasioglossum marginellum (SCHENCK, 1853)	NO	NO	NO	NO	YES	YES	YES	YES	NO	NO	NO	NO
Megachile nigriventris SCHENCK, 1868	NO	NO	NO	NO	YES	YES	YES	YES	NO	NO	NO	NO
Nomada armata HERRICH-SCHÄFFER, 1839	NO	NO	NO	NO	YES	YES	YES	YES	NO	NO	NO	NO
Nomada braunsiana SCHMIEDEKNECHT, 1882	NO	NO	NO	NO	YES	YES	YES	YES	NO	NO	NO	NO
Nomada facilis SCHWARZ, 1967	NO	NO	NO	NO	YES	YES	YES	YES	NO	NO	NO	NO
Nomada kohli SCHMIEDEKNECHT, 1882	NO	NO	NO	NO	YES	YES	YES	YES	NO	NO	NO	NO
Osmia andrenoides SPINOLA, 1808	NO	NO	NO	NO	YES	YES	YES	YES	NO	NO	NO	NO
Osmia anthocopoides SCHENCK, 1853	NO	NO	NO	NO	YES	YES	YES	YES	NO	NO	NO	NO
Osmia inermis (ZETTERSTEDT, 1838)	NO	NO	NO	NO	YES	YES	YES	YES	NO	NO	NO	NO
Osmia maritima FRIESE, 1885	NO	NO	NO	NO	YES	YES	YES	YES	NO	NO	NO	NO
Sphecodes marginatus VON HAGENS, 1882	NO	NO	NO	NO	YES	YES	YES	YES	NO	NO	NO	NO
Stelis nasuta (LATREILLE, 1809)	NO	NO	NO	NO	YES	YES	YES	YES	NO	NO	NO	NO
Stelis signata (LATREILLE, 1809)	NO	NO	NO	NO	YES	YES	YES	YES	NO	NO	NO	NO
Andrena curvungula THOMSON, 1870	NO	NO	NO	NO	YES	YES	YES	NO	NO	NO	NO	NO
Andrena fucata SMITH, 1847	NO	NO	NO	NO	YES	YES	YES	NO	NO	NO	NO	NO
Andrena humilis IMHOFF, 1832	NO	NO	NO	NO	YES	YES	YES	NO	NO	NO	NO	NO
Andrena labialis (KIRBY, 1802)	NO	NO	NO	NO	YES	YES	YES	NO	NO	NO	NO	NO
Andrena lapponica ZETTERSTEDT, 1838	NO	NO	NO	NO	YES	YES	YES	NO	NO	NO	NO	NO
Andrena schencki MORAWITZ, 1866	NO	NO	NO	NO	YES	YES	YES	NO	NO	NO	NO	NO
Andrena semilaevis PÉREZ, 1903	NO	NO	NO	NO	YES	YES	YES	NO	NO	NO	NO	NO
Andrena suerinensis FRIESE, 1884	NO	NO	NO	NO	YES	YES	YES	NO	NO	NO	NO	NO
Andrena synadelpha PERKINS, 1914	NO	NO	NO	NO	YES	YES	YES	NO	NO	NO	NO	NO
Eucera cineraria EVERSMANN, 1852	NO	NO	NO	NO	YES	YES	YES	NO	NO	NO	NO	NO
Eucera longicornis (LINNAEUS, 1758)	NO	NO	NO	NO	YES	YES	YES	NO	NO	NO	NO	NO
Nomada moeschleri ALFKEN, 1913	NO	NO	NO	NO	YES	YES	YES	NO	NO	NO	NO	NO
Nomada mutabilis MORAWITZ, 1870^	NO	NO	NO	NO	YES	YES	YES	NO	NO	NO	NO	NO
Nomada piccioliana MAGRETTI, 1883	NO	NO	NO	NO	YES	YES	YES	NO	NO	NO	NO	NO
Nomada posthuma BLÜTHGEN, 1949	NO	NO	NO	NO	YES	YES	YES	NO	NO	NO	NO	NO
Osmia papaveris (LATREILLE, 1799)	NO	NO	NO	NO	YES	YES	YES	NO	NO	NO	NO	NO
Osmia villosa (SCHENCK, 1853)	NO	NO	NO	NO	YES	YES	YES	NO	NO	NO	NO	NO
Sphecodes rubicundus VON HAGENS, 1875	NO	NO	NO	NO	YES	YES	YES	NO	NO	NO	NO	NO
Sphecodes spinulosus VON HAGENS, 1875	NO	NO	NO	NO	YES	YES	YES	NO	NO	NO	NO	NO
Stelis franconica BLÜTHGEN, 1930	NO	NO	NO	NO	YES	YES	YES	NO	NO	NO	NO	NO
Andrena agilissima (SCOPOLI, 1770)	NO	NO	NO	NO	YES	YES	NO	NO	NO	NO	NO	NO
Andrena chrysopus PÉREZ, 1903	NO	NO	NO	NO	YES	YES	NO	NO	NO	NO	NO	NO
Andrena combinata (CHRIST, 1791)	NO	NO	NO	NO	YES	YES	NO	NO	NO	NO	NO	NO
Andrena ferox SMITH, 1847	NO	NO	NO	NO	YES	YES	NO	NO	NO	NO	NO	NO
Andrena nasuta GIRAUD, 1863	NO	NO	NO	NO	YES	YES	NO	NO	NO	NO	NO	NO
Andrena pandellei PÉREZ, 1895	NO	NO	NO	NO	YES	YES	NO	NO	NO	NO	NO	NO
Andrena paucisquama NOSKIEWICZ, 1924	NO	NO	NO	NO	YES	YES	NO	NO	NO	NO	NO	NO
Nomada conjungens HERRICH-SCHÄFFER, 1839	NO	NO	NO	NO	YES	YES	NO	NO	NO	NO	NO	NO
Nomada nobilis HERRICH-SCHÄFFER, 1839	NO	NO	NO	NO	YES	YES	NO	NO	NO	NO	NO	NO
Nomada opaca ALFKEN, 1913	NO	NO	NO	NO	YES	YES	NO	NO	NO	NO	NO	NO
Nomada rostrata HERRICH-SCHÄFFER, 1839	NO	NO	NO	NO	YES	YES	NO	NO	NO	NO	NO	NO
Nomada symphyti STÖCKHERT, 1930	NO	NO	NO	NO	YES	YES	NO	NO	NO	NO	NO	NO
Osmia cerinthidis MORAWITZ, 1876^	NO	NO	NO	NO	YES	YES	NO	NO	NO	NO	NO	NO
Osmia submicans MORAWITZ, 1870	NO	NO	NO	NO	YES	YES	NO	NO	NO	NO	NO	NO
Bombus gerstaeckeri MORAWITZ, 1882	NO	NO	NO	NO	NO	YES	YES	YES	YES	YES	NO	NO
Andrena coitana (KIRBY, 1802)	NO	NO	NO	NO	NO	YES	YES	YES	YES	NO	NO	NO
Andrena decipiens SCHENCK, 1861	NO	NO	NO	NO	NO	YES	YES	YES	YES	NO	NO	NO
Anthidium nanum MOCSÁRY, 1879	NO	NO	NO	NO	NO	YES	YES	YES	YES	NO	NO	NO
Bombus flavidus EVERSMANN, 1852	NO	NO	NO	NO	NO	YES	YES	YES	YES	NO	NO	NO
Coelioxys rufescens LEPELETIER & SERVILLE, 1825	NO	NO	NO	NO	NO	YES	YES	YES	YES	NO	NO	NO
Colletes daviesanus SMITH, 1846	NO	NO	NO	NO	NO	YES	YES	YES	YES	NO	NO	NO
Colletes similis SCHENCK, 1853	NO	NO	NO	NO	NO	YES	YES	YES	YES	NO	NO	NO
Dasypoda argentata (PANZER, 1809)	NO	NO	NO	NO	NO	YES	YES	YES	YES	NO	NO	NO
Dasypoda hirtipes (FABRICIUS, 1793)	NO	NO	NO	NO	NO	YES	YES	YES	YES	NO	NO	NO
Dufourea minuta LEPELETIER, 1841	NO	NO	NO	NO	NO	YES	YES	YES	YES	NO	NO	NO
Dufourea paradoxa (MORAWITZ, 1867)	NO	NO	NO	NO	NO	YES	YES	YES	YES	NO	NO	NO
Eucera dentata GERMAR, 1839	NO	NO	NO	NO	NO	YES	YES	YES	YES	NO	NO	NO
Hylaeus annulatus (LINNAEUS, 1758)	NO	NO	NO	NO	NO	YES	YES	YES	YES	NO	NO	NO
Hylaeus brevicornis NYLANDER, 1852	NO	NO	NO	NO	NO	YES	YES	YES	YES	NO	NO	NO
Hylaeus clypearis (SCHENCK, 1853)	NO	NO	NO	NO	NO	YES	YES	YES	YES	NO	NO	NO
Hylaeus dilatatus (KIRBY, 1802)	NO	NO	NO	NO	NO	YES	YES	YES	YES	NO	NO	NO
Hylaeus kahri FÖRSTER, 1871	NO	NO	NO	NO	NO	YES	YES	YES	YES	NO	NO	NO
Hylaeus lineolatus (SCHENCK, 1861)	NO	NO	NO	NO	NO	YES	YES	YES	YES	NO	NO	NO
Hylaeus variegatus (FABRICIUS, 1798)	NO	NO	NO	NO	NO	YES	YES	YES	YES	NO	NO	NO
Megachile genalis MORAWITZ, 1880	NO	NO	NO	NO	NO	YES	YES	YES	YES	NO	NO	NO
Megachile ligniseca (KIRBY, 1802)	NO	NO	NO	NO	NO	YES	YES	YES	YES	NO	NO	NO
Megachile rotundata (FABRICIUS, 1787)	NO	NO	NO	NO	NO	YES	YES	YES	YES	NO	NO	NO
Melitta haemorrhoidalis (FABRICIUS, 1775)	NO	NO	NO	NO	NO	YES	YES	YES	YES	NO	NO	NO
Melitta leporina (PANZER, 1799)	NO	NO	NO	NO	NO	YES	YES	YES	YES	NO	NO	NO
Nomada fuscicornis NYLANDER, 1848	NO	NO	NO	NO	NO	YES	YES	YES	YES	NO	NO	NO
Nomada similis MORAWITZ, 1872	NO	NO	NO	NO	NO	YES	YES	YES	YES	NO	NO	NO
Osmia adunca (PANZER, 1798)	NO	NO	NO	NO	NO	YES	YES	YES	YES	NO	NO	NO
Osmia crenulata (NYLANDER, 1856)	NO	NO	NO	NO	NO	YES	YES	YES	YES	NO	NO	NO
Osmia loti MORAWITZ, 1867	NO	NO	NO	NO	NO	YES	YES	YES	YES	NO	NO	NO
Osmia truncorum (LINNAEUS, 1758)	NO	NO	NO	NO	NO	YES	YES	YES	YES	NO	NO	NO
Panurgus calcaratus (SCOPOLI, 1763)	NO	NO	NO	NO	NO	YES	YES	YES	YES	NO	NO	NO
Panurgus dentipes LATREILLE, 1811	NO	NO	NO	NO	NO	YES	YES	YES	YES	NO	NO	NO
Stelis minuta LEPELETIER & SERVILLE, 1825	NO	NO	NO	NO	NO	YES	YES	YES	YES	NO	NO	NO
Ammobates punctatus (FABRICIUS, 1804)	NO	NO	NO	NO	NO	YES	YES	YES	NO	NO	NO	NO
Ammobatoides abdominalis (EVERSMANN, 1852)	NO	NO	NO	NO	NO	YES	YES	YES	NO	NO	NO	NO
Andrena nigriceps (KIRBY, 1802)	NO	NO	NO	NO	NO	YES	YES	YES	NO	NO	NO	NO
Andrena nitidiuscula SCHENCK, 1853	NO	NO	NO	NO	NO	YES	YES	YES	NO	NO	NO	NO
Anthidium byssinum (PANZER, 1798)	NO	NO	NO	NO	NO	YES	YES	YES	NO	NO	NO	NO
Anthidium manicatum (LINNAEUS, 1758)	NO	NO	NO	NO	NO	YES	YES	YES	NO	NO	NO	NO
Anthidium oblongatum (ILLIGER, 1806)	NO	NO	NO	NO	NO	YES	YES	YES	NO	NO	NO	NO
Anthophora furcata (PANZER, 1798)	NO	NO	NO	NO	NO	YES	YES	YES	NO	NO	NO	NO
Anthophora pubescens (FABRICIUS, 1781)	NO	NO	NO	NO	NO	YES	YES	YES	NO	NO	NO	NO
Biastes brevicornis (PANZER, 1798)	NO	NO	NO	NO	NO	YES	YES	YES	NO	NO	NO	NO
Coelioxys afra LEPELETIER, 1841	NO	NO	NO	NO	NO	YES	YES	YES	NO	NO	NO	NO
Coelioxys alata FÖRSTER, 1853	NO	NO	NO	NO	NO	YES	YES	YES	NO	NO	NO	NO
Coelioxys aurolimbata FÖRSTER, 1853	NO	NO	NO	NO	NO	YES	YES	YES	NO	NO	NO	NO
Coelioxys brevis EVERSMANN, 1852	NO	NO	NO	NO	NO	YES	YES	YES	NO	NO	NO	NO
Coelioxys conoidea (ILLIGER, 1806)	NO	NO	NO	NO	NO	YES	YES	YES	NO	NO	NO	NO
Coelioxys mandibularis NYLANDER, 1848	NO	NO	NO	NO	NO	YES	YES	YES	NO	NO	NO	NO
Colletes impunctatus NYLANDER, 1852	NO	NO	NO	NO	NO	YES	YES	YES	NO	NO	NO	NO
Colletes mlokossewiczi RADOSZKOWSKI, 1891	NO	NO	NO	NO	NO	YES	YES	YES	NO	NO	NO	NO
Colletes nasutus SMITH, 1853	NO	NO	NO	NO	NO	YES	YES	YES	NO	NO	NO	NO
Dufourea alpina MORAWITZ, 1865	NO	NO	NO	NO	NO	YES	YES	YES	NO	NO	NO	NO
Epeolus schummeli SCHILLING, 1849	NO	NO	NO	NO	NO	YES	YES	YES	NO	NO	NO	NO
Epeolus variegatus (LINNAEUS, 1758)	NO	NO	NO	NO	NO	YES	YES	YES	NO	NO	NO	NO
Eucera macroglossa ILLIGER, 1806	NO	NO	NO	NO	NO	YES	YES	YES	NO	NO	NO	NO
Eucera salicariae (LEPELETIER, 1841)	NO	NO	NO	NO	NO	YES	YES	YES	NO	NO	NO	NO
Halictus simplex BLÜTHGEN, 1923	NO	NO	NO	NO	NO	YES	YES	YES	NO	NO	NO	NO
Hylaeus cardioscapus COCKERELL, 1924	NO	NO	NO	NO	NO	YES	YES	YES	NO	NO	NO	NO
Hylaeus cornutus CURTIS, 1831	NO	NO	NO	NO	NO	YES	YES	YES	NO	NO	NO	NO
Hylaeus difformis (EVERSMANN, 1852)	NO	NO	NO	NO	NO	YES	YES	YES	NO	NO	NO	NO
Hylaeus gracilicornis (MORAWITZ, 1867)	NO	NO	NO	NO	NO	YES	YES	YES	NO	NO	NO	NO
Hylaeus gredleri FÖRSTER, 1871	NO	NO	NO	NO	NO	YES	YES	YES	NO	NO	NO	NO
Hylaeus moricei (FRIESE, 1898)	NO	NO	NO	NO	NO	YES	YES	YES	NO	NO	NO	NO
Hylaeus pictipes NYLANDER, 1852	NO	NO	NO	NO	NO	YES	YES	YES	NO	NO	NO	NO
Hylaeus rinki (GORSKI, 1852)	NO	NO	NO	NO	NO	YES	YES	YES	NO	NO	NO	NO
Hylaeus sinuatus (SCHENCK, 1853)	NO	NO	NO	NO	NO	YES	YES	YES	NO	NO	NO	NO
Hylaeus styriacus FÖRSTER, 1871	NO	NO	NO	NO	NO	YES	YES	YES	NO	NO	NO	NO
Megachile apicalis SPINOLA, 1808	NO	NO	NO	NO	NO	YES	YES	YES	NO	NO	NO	NO
Megachile ericetorum LEPELETIER, 1841	NO	NO	NO	NO	NO	YES	YES	YES	NO	NO	NO	NO
Megachile lagopoda (LINNAEUS, 1761)	NO	NO	NO	NO	NO	YES	YES	YES	NO	NO	NO	NO
Megachile lapponica THOMSON, 1872	NO	NO	NO	NO	NO	YES	YES	YES	NO	NO	NO	NO
Megachile maritima (KIRBY, 1802)	NO	NO	NO	NO	NO	YES	YES	YES	NO	NO	NO	NO
Melitturga clavicornis (LATREILLE, 1806)	NO	NO	NO	NO	NO	YES	YES	YES	NO	NO	NO	NO
Nomada errans LEPELETIER, 1841	NO	NO	NO	NO	NO	YES	YES	YES	NO	NO	NO	NO
Nomada pleurosticta HERRICH-SCHÄFFER, 1839	NO	NO	NO	NO	NO	YES	YES	YES	NO	NO	NO	NO
Nomioides minutissimus (ROSSI, 1790)	NO	NO	NO	NO	NO	YES	YES	YES	NO	NO	NO	NO
Osmia acuticornis DUFOUR & PERRIS, 1840	NO	NO	NO	NO	NO	YES	YES	YES	NO	NO	NO	NO
Osmia claviventris THOMSON, 1872	NO	NO	NO	NO	NO	YES	YES	YES	NO	NO	NO	NO
Osmia lepeletieri PÉREZ, 1879	NO	NO	NO	NO	NO	YES	YES	YES	NO	NO	NO	NO
Osmia leucomelana (KIRBY, 1802)	NO	NO	NO	NO	NO	YES	YES	YES	NO	NO	NO	NO
Osmia tridentata DUFOUR & PERRIS, 1840	NO	NO	NO	NO	NO	YES	YES	YES	NO	NO	NO	NO
Panurginus herzi MORAWITZ, 1892	NO	NO	NO	NO	NO	YES	YES	YES	NO	NO	NO	NO
Panurginus montanus GIRAUD, 1861	NO	NO	NO	NO	NO	YES	YES	YES	NO	NO	NO	NO
Panurgus banksianus (KIRBY, 1802)	NO	NO	NO	NO	NO	YES	YES	YES	NO	NO	NO	NO
Rhophitoides canus (EVERSMANN, 1852)	NO	NO	NO	NO	NO	YES	YES	YES	NO	NO	NO	NO
Rophites quinquespinosus SPINOLA, 1808	NO	NO	NO	NO	NO	YES	YES	YES	NO	NO	NO	NO
Stelis minima SCHENCK, 1861	NO	NO	NO	NO	NO	YES	YES	YES	NO	NO	NO	NO
Stelis odontopyga NOSKIEWICZ, 1926	NO	NO	NO	NO	NO	YES	YES	YES	NO	NO	NO	NO
Systropha curvicornis (SCOPOLI, 1770)	NO	NO	NO	NO	NO	YES	YES	YES	NO	NO	NO	NO
Systropha planidens GIRAUD, 1861	NO	NO	NO	NO	NO	YES	YES	YES	NO	NO	NO	NO
Coelioxys lanceolata NYLANDER, 1852	NO	NO	NO	NO	NO	YES	YES	NO	NO	NO	NO	NO
Epeolus alpinus FRIESE, 1893	NO	NO	NO	NO	NO	YES	YES	NO	NO	NO	NO	NO
Osmia brevicornis (FABRICIUS, 1798)	NO	NO	NO	NO	NO	YES	YES	NO	NO	NO	NO	NO
Osmia tuberculata NYLANDER, 1848	NO	NO	NO	NO	NO	YES	YES	NO	NO	NO	NO	NO
Pseudapis femoralis (PALLAS, 1773)	NO	NO	NO	NO	NO	YES	YES	NO	NO	NO	NO	NO
Rophites algirus PÉREZ, 1895	NO	NO	NO	NO	NO	YES	YES	NO	NO	NO	NO	NO
Sphecodes cristatus VON HAGENS, 1882	NO	NO	NO	NO	NO	YES	YES	NO	NO	NO	NO	NO
Andrena angustior (KIRBY, 1802)	NO	NO	NO	NO	NO	NO	YES	YES	YES	NO	NO	NO
Andrena marginata FABRICIUS, 1776	NO	NO	NO	NO	NO	NO	YES	YES	YES	NO	NO	NO
Andrena simillima SMITH, 1851	NO	NO	NO	NO	NO	NO	YES	YES	YES	NO	NO	NO
Colletes marginatus SMITH, 1846	NO	NO	NO	NO	NO	NO	YES	YES	YES	NO	NO	NO
Eucera alticincta (LEPELETIER, 1841)	NO	NO	NO	NO	NO	NO	YES	YES	YES	NO	NO	NO
Megachile pyrenaea PÉREZ, 1890	NO	NO	NO	NO	NO	NO	YES	YES	YES	NO	NO	NO
Nomada argentata HERRICH-SCHÄFFER, 1839	NO	NO	NO	NO	NO	NO	YES	YES	YES	NO	NO	NO
Nomada baccata SMITH, 1844	NO	NO	NO	NO	NO	NO	YES	YES	YES	NO	NO	NO
Nomada roberjeotiana PANZER, 1799	NO	NO	NO	NO	NO	NO	YES	YES	YES	NO	NO	NO
Nomada rufipes FABRICIUS, 1793	NO	NO	NO	NO	NO	NO	YES	YES	YES	NO	NO	NO
Andrena denticulata (KIRBY, 1802)	NO	NO	NO	NO	NO	NO	YES	YES	NO	NO	NO	NO
Andrena pallitarsis PÉREZ, 1903^	NO	NO	NO	NO	NO	NO	YES	YES	NO	NO	NO	NO
Camptopoeum frontale (FABRICIUS, 1804)	NO	NO	NO	NO	NO	NO	YES	YES	NO	NO	NO	NO
Coelioxys echinata FÖRSTER, 1853	NO	NO	NO	NO	NO	NO	YES	YES	NO	NO	NO	NO
Colletes fodiens (GEOFFROY, 1785)	NO	NO	NO	NO	NO	NO	YES	YES	NO	NO	NO	NO
Colletes hylaeiformis EVERSMANN, 1852^	NO	NO	NO	NO	NO	NO	YES	YES	NO	NO	NO	NO
Dufourea dentiventris (NYLANDER, 1848)	NO	NO	NO	NO	NO	NO	YES	YES	NO	NO	NO	NO
Dufourea halictula (NYLANDER, 1852)	NO	NO	NO	NO	NO	NO	YES	YES	NO	NO	NO	NO
Dufourea inermis (NYLANDER, 1848)	NO	NO	NO	NO	NO	NO	YES	YES	NO	NO	NO	NO
Epeoloides coecutiens (FABRICIUS, 1775)	NO	NO	NO	NO	NO	NO	YES	YES	NO	NO	NO	NO
Epeolus cruciger (PANZER, 1799)	NO	NO	NO	NO	NO	NO	YES	YES	NO	NO	NO	NO
Melitta nigricans ALFKEN, 1905	NO	NO	NO	NO	NO	NO	YES	YES	NO	NO	NO	NO
Nomada obtusifrons NYLANDER, 1848	NO	NO	NO	NO	NO	NO	YES	YES	NO	NO	NO	NO
Thyreus histrionicus (ILLIGER, 1806)	NO	NO	NO	NO	NO	NO	YES	YES	NO	NO	NO	NO
Colletes collaris DOURS, 1872	NO	NO	NO	NO	NO	NO	NO	YES	YES	YES	NO	NO
Colletes halophilus VERHOEFF, 1944	NO	NO	NO	NO	NO	NO	NO	YES	YES	YES	NO	NO
Colletes hederae SCHMIDT & WESTRICH, 1993	NO	NO	NO	NO	NO	NO	NO	YES	YES	YES	NO	NO
Colletes succinctus (LINNAEUS, 1758)	NO	NO	NO	NO	NO	NO	NO	YES	YES	NO	NO	NO
Melitta tricincta KIRBY, 1802	NO	NO	NO	NO	NO	NO	NO	YES	YES	NO	NO	NO
